# Supplementary material for: Three-dimensional greyscale transrectal ultrasound-guidance and biopsy core preembedding for detection of prostate cancer: Dutch clinical cohort study
Source: BMC Urol. 2019 Apr 16;19:23. doi: 10.1186/s12894-019-0455-7 (PMC6469087; doi:10.1186/s12894-019-0455-7)
Supplement: Supplementary file 3 — Tumour biopsy characteristics among patients with positive biopsies. (XLSX 12 kb) [file 12894_2019_455_MOESM3_ESM.xlsx]

## Sheet: Blad1
Table 3. Tumour biopsy characteristics among patients with positive biopsies
	Total	2D TRUS	3D TRUS
Prostate cancer, all PCa	N= 568	N= 385	N= 183	P value
Positive biopsy cores per PCa session, median (IQR)
· Whole group
· Biopsy naive group	3.0 (1.0-5.0)	3.0 (1.0-5.0)	3.0 (1.0-6.0)	0.071
· Prior negative group	3.0 (1.0-6.0)	3.0 (1.0-5.0)	3.0 (2.0-6.0)	0.076
	2.0 (1.0-3.5)	2.0 (1.0-3.0)	2.0 (1.0-4.0)	0.681
Ratio positive biopsy cores/total biopsy cores per PCa session, median (IQR)
· Whole group
· Biopsy naive group	0.25 (0.08-0.42)	0.19 (0.08-0.42)	0.25 (0.10-0.50)	0.093
· Prior negative group	0.25 (0.08-0.43)	0.25 (0.08-0.42)	0.25 (0.16-0.50)	0.091
	0.17 (0.08-0.25)	0.17 (0.08-0.25)	0.17 (0.08-0.32)	0.768
Tumorvolume% of biopsy cores per PCa session, median (IQR)*
· Whole group
· Biopsy naive group	5.5 (2.5-16.3)	5.5 (2.5-18.1)	5.0 (2.5-15.0)	0.310
· Prior negative group	7.5 (2.5-20.0)	7.5 (2.5-24.1)	7.0 (2.5-16.9)	0.146
	2.5 (2.5-7.5)	2.5 (2.5-5.3)	3.6 (2.5-9.7)	0.142
Prostate cancer, clinically significant Pca	N= 335	N= 218	N= 117
Positive biopsy cores per clin. sign. PCa session, median (IQR)**
· Whole group
· Biopsy naive group	5.0 (3.0-7.0)	4.0 (3.0-7.0)	5.0 (3.0-7.0)	0.681
· Prior negative group	5.0 (3.0-7.0)	5.0 (3.0-7.0)	5.0 (3.0-7.0)	0.878
	4.0 (3.0-6.0)	4.0 (3.0-6.0)	4.5 (4.0-5.0)	0.408
Ratio positive biopsy cores/total biopsy cores per clin. sign. PCa session, median (IQR)
· Whole group
· Biopsy naive group
· Prior negative group	0.36 (0.25-0.58)	0.33 (0.25-0.58)	0.37 (0.25-0.58)	0.536
	0.42 (0.25-0.58)	0.42 (0.25-0.58)	0.40 (0.25-0.58)	0.779
	0.31 (0.25-0.50)	0.27 (0.21-0.50)	0.35 (0.27-0.42)	0.233
Tumorvolume% of biopsy cores per clin. sign. PCa session, median (IQR) **
· Whole group
· Biopsy naive group	12.5 (5.0-30.0)	15.0 (5.0-33.0)	10.0 (5.0-25.0)	0.220
· Prior negative group	12.5 (5.0-30.0)	15.0 (7.0-33.5)	10.0 (5.0-27.5)	0.134
	11.3 (3.6-21.0)	5.5 (2.1-28.5)	13.0 (5.0-20.8)	0.521
* Biopsy sessions from 2012-2016: before 2012 there was no adequate tumorvolume% of biopsy cores in PA-reports
(Whole group, N= 323: 2D TRUS: 142 vs. 3D TRUS: 181. Biopsy naive group N= 269: 120 vs. 149. Prior negative group N= 54: 22 vs. 32).
**Biopsy sessions from 2012-2016: before 2012 there was no adequate tumorvolume% of biopsy cores in PA-reports
(Whole group, N=205: 2D TRUS: 90 vs. 3D TRUS: 115. Biopsy naive group N= 185: 82 vs. 103. Prior negative group N= 20: 8 vs. 12).
