# Supplementary material for: Three-dimensional greyscale transrectal ultrasound-guidance and biopsy core preembedding for detection of prostate cancer: Dutch clinical cohort study
Source: BMC Urol. 2019 Apr 16;19:23. doi: 10.1186/s12894-019-0455-7 (PMC6469087; doi:10.1186/s12894-019-0455-7)
Supplement: Supplementary file 4 — Biopsy Gleason score among patients with positive biopsies. (XLSX 13 kb) [file 12894_2019_455_MOESM4_ESM.xlsx]

## Sheet: Blad1
Table 4. Biopsy Gleason score among patients with positive biopsies
Gleason score	Total	2D TRUS	3D TRUS
Whole group	N= 568	N= 385	N= 183	P-value*
Clinically insignificant PCa
· Gleason 6 (≤ 2 positive cores)	235 (41.4 %)	169 (43.9 %)	66 (36.1 %)	0.032
Clinically significant PCa
· Gleason 6 ( > 2 positive cores)	193 (34.0 %)	135 (35.1 %)	58 (31.7 %)
· Gleason 7	93 (16.4 %)	55 (14. 3%)	38 (20.8 %)
o Gleason 7 (3+4)	70 (12.3 %)	41 (10.6 %)	29 (15.8 %)
o Gleason 7 (4+3)	23 (4.0 %)	14 (3.6 %)	9 (4.9 %)
· Gleason > 7	47 (8.3 %)	26 (6.8 %)	21 (11.5 %)
o Gleason 8 (4+4)	23 (4.0 %)	18 (4.7 %)	5 (2.7 %)
o Gleason 8 (3+5)	10 (1.8 %)	3 (0.8 %)	7 (3.8 %)
o Gleason 8 (5+3)	2 (0.4 %)	2 (0.5 %)	0
o Gleason 9 (4+5)	7 (1.2 %)	2 (0.5 %)	5 (2.7 %)
o Gleason 9 (5+4)	3 (0.5 %)	1 (0.3 %)	2 (1.1 %)
o Gleason 10 (5+5)	2 (0.4 %)	0	2 (1.1%)
Biopsy naive group	N= 466	N= 315	N= 151	P-value*
Clinically insignificant PCa
· Gleason 6 (≤ 2 positive cores)	172 (36.9 %)	126 (40.0 %)	46 (30.5 %)	0.045
Gleason pattern
· Gleason 6 ( > 2 positive cores)	168 (36.1 %)	116 (36.8 %)	52 (34.4 %)
· Gleason 7	83 (17.1 %)	48 (15.2 %)	35 (23.2 %)
o Gleason 7 (3+4)	61 (13.1 %)	35 (11.1 %)	26 (17.2 %)
o Gleason 7 (4+3)	22 (4.7 %)	13 (4.1 %)	9 (6.0 %)
· Gleason > 7	43 (9.2 %)	25 (7.9 %)	18 (11.9 %)
o Gleason 8 (4+4)	22 (4.7 %)	18 (5.7 %)	4 (2.6 %)
o Gleason 8 (3+5)	8 (1.7 %)	2 (0.6 %)	6 (4.0 %)
o Gleason 8 (5+3)	2 (0.4 %)	2 (0.6 %)	0
o Gleason 9 (4+5)	6 (1.3 %)	2 (0.6 %)	4 (2.6 %)
o Gleason 9 (5+4)	3 (0.6 %)	1 (0.3 %)	2 (1.3 %)
o Gleason 10 (5+5)	2 (0.4 %)	0	2 (1.3 %)
Prior negative group	N= 102	N= 70	N= 32	P-value**
Clinically insignificant PCa
· Gleason 6 (≤ 2 positive cores)	63 (61.8 %)	43 (61.4 %)	20 (62.5 %)	.474
Gleason pattern
· Gleason 6 ( > 2 positive cores)	25 (24.5 %)	19 (27.1 %)	6 (18.8 %)
· Gleason 7	10 (9.8 %)	7 (10.0 %)	3 (9.4 %)
o Gleason 7 (3+4)	9 (8.8 %)	6 (8.6 %)	3 (9.4 %)
o Gleason 7 (4+3)	1 (1.0 %)	1 (1.4 %)	0
· Gleason > 7	4 (3.9 %)	1 (1.4 %)	3 (9.4 %)
o Gleason 8 (4+4)	1 (1.0 %)	0	1 (3.1 %)
o Gleason 8 (3+5)	2 (2.0 %)	1 (1.4 %)	1 (3.1 %)
o Gleason 8 (5+3)	0	0	0
o Gleason 9 (4+5)	1 (1.0 %)	0	1 (3.1%)
o Gleason 9 (5+4)	0	0	0
o Gleason 10 (5+5)	0	0	0
* Difference with corresponding P-value analysed with the Pearson’s chi–square test for Gleason score 6 (≤ 2), 6 (> 2), 7 or >7.
** Difference with corresponding P-value analysed with the Pearson’s chi–square test for Gleason score 6 (≤ 2), 6 (> 2) or ≥7.
